# Supplementary material for: Rate-limiting steps in the dark-to-light transition of Photosystem II - revealed by chlorophyll-a fluorescence induction
Source: PubMed Central journal article supplement (PMC5807364; doi:10.1038/s41598-018-21195-2), 2018-02-09
Supplement: 41598_2018_21195_MOESM1_ESM.pdf [file 41598_2018_21195_MOESM1_ESM.pdf]

## Rate-limiting steps in the dark-to-light transition of Photosystem II - revealed by chlorophyll-*a* fluorescence induction

Melinda Magyar<sup>1</sup>, Gábor Sipka<sup>1</sup>, László Kovács<sup>1</sup>, Bettina Ughy<sup>1</sup>, Qingjun Zhu<sup>2</sup>, Guangye Han<sup>2</sup>, Vladimír Špunda<sup>3,4</sup>, Petar H. Lambrev<sup>1</sup>, Jian-Ren Shen<sup>2,5</sup>, Győző Garab<sup>\*1,3</sup>

<sup>1</sup>Institute of Plant Biology, Biological Research Center, Hungarian Academy of Sciences, Temesvári körút 62, H-6726 Szeged, Hungary

<sup>2</sup>Photosynthesis Research Center, Key Laboratory of Photobiology, Institute of Botany, the Chinese Academy of Sciences, Beijing 100093, China

<sup>3</sup>Department of Physics, Faculty of Science, University of Ostrava, Chittussiho 10, CZ-710 00 Ostrava, Czech Republic

<sup>4</sup>Global Change Research Institute, Czech Academy of Sciences, Bělidla 986/4a, 603 00 Brno, Czech Republic

<sup>5</sup>Research Institute for Interdisciplinary Science and Graduate School of Natural Science and Technology, Okayama University, 1-1, Naka 3-chome, Tsushima, Okayama 700-8530, Japan

\*corresponding author

### Supplementary information

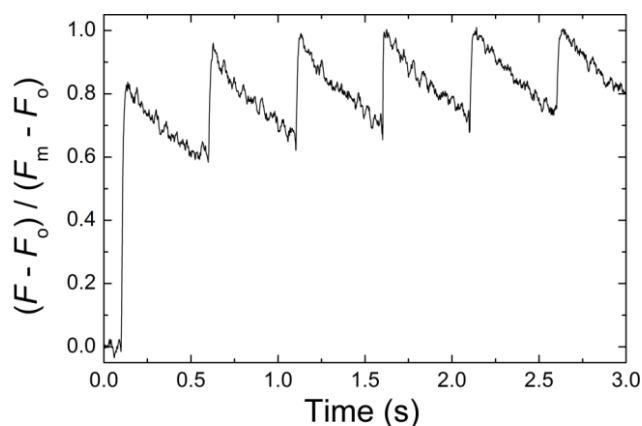

**Supplementary Figure S1.  $F_0$ -to- $F_m$  rise induced by a train of STSFs.** Kinetics of chlorophyll-*a* fluorescence of isolated spinach thylakoid membranes in the presence of 40  $\mu$ M DCMU at 293 K.

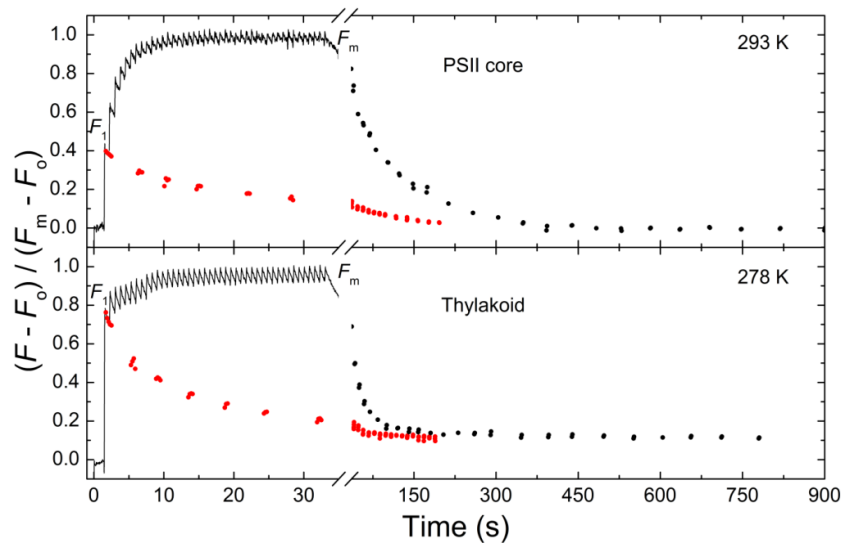

**Supplementary Figure S2. Chlorophyll-*a* fluorescence induction and decay at physiological temperatures.** Kinetic traces of STSF-induced fluorescence transients in isolated PSII core complexes and spinach thylakoid membranes, measured at 293 and 278 K, respectively. Red and black data points belong to transients induced by a single STSF and a train of STSFs, respectively. As in Figure 1, the measuring beam during the decay was turned on and off intermittently to avoid its actinic effect.

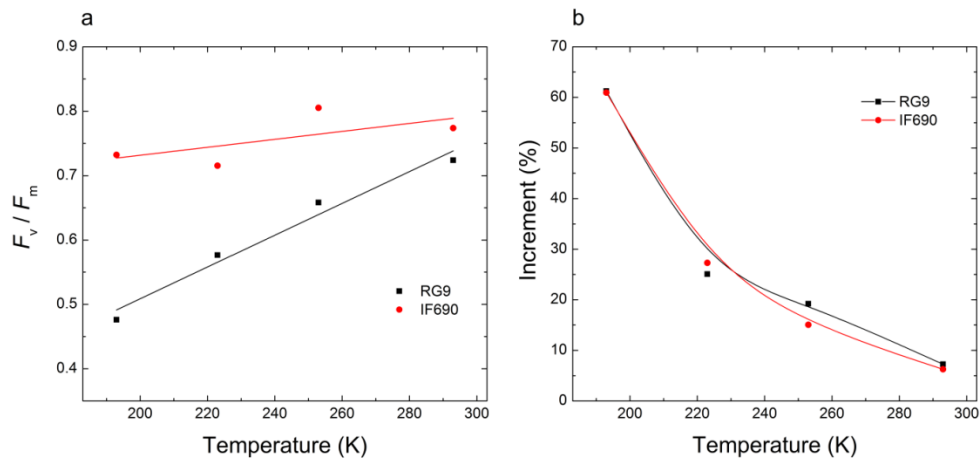

**Supplementary Figure S3. Temperature dependences of fluorescence induction parameters recorded with two different optical filters.** The  $F_v/F_m$  parameter (a) and the  $F_1$ -to- $F_m$  increment relative to  $F_m - F_0$  (b) of the fluorescence transients of isolated thylakoid membranes measured with Xe-PAM fluorometer using a longpass filter (RG9 >740 nm, which allows the detection of fluorescence both from PSI and PSII) and a narrow-band interference filter (IF690, 690 nm) for PSII emission. Curves in panel b were obtained by b-spline interpolation.

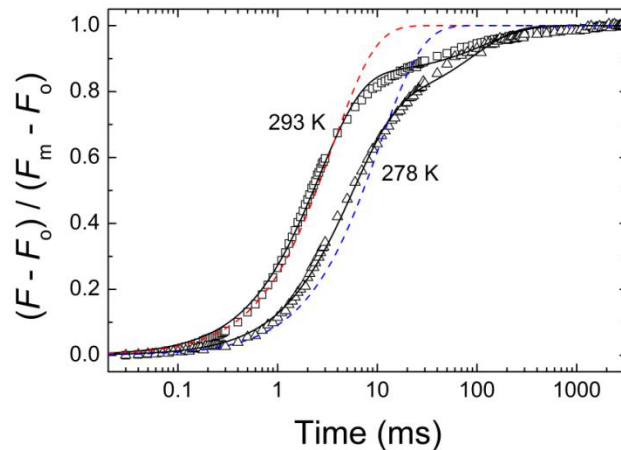

**Supplementary Figure S4. Sigmoidicity of the fast fluorescence rise of solubilised PSII core particles.** The rise was recorded on DCMU-treated PSII core at 293 and 278 K and the kinetics were fitted with one (dashed lines) and two (continuous lines) exponentials. The measurements were carried out using a Handy-PEA instrument (Hansatech Instruments Ltd., UK), following the method described earlier<sup>8</sup> – using a photon flux density of the excitation of  $3500 \mu\text{mol photons m}^{-2} \text{s}^{-1}$ . Fitting parameters:  $A = 1$ ,  $1/k = 3.5 \text{ ms}$ ;  $A_1 = 0.85$ ,  $1/k_1 = 2.6 \text{ ms}$  and  $A_2 = 0.15$ ,  $1/k_2 = 126 \text{ ms}$  (293 K); and  $A = 1$ ,  $1/k = 10.4 \text{ ms}$ ;  $A_1 = 0.75$ ,  $1/k_1 = 5.5 \text{ ms}$  and  $A_2 = 0.25$ ,  $1/k_2 = 92 \text{ ms}$  (278 K).

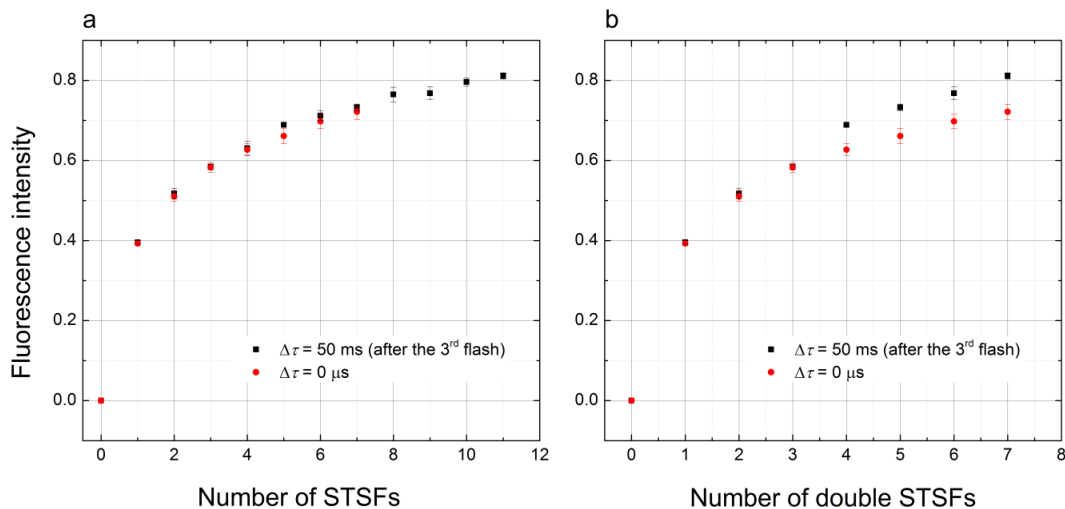

**Supplementary Figure S5. Fluorescence intensity levels as a function of the number of flash excitations.** Fluorescence intensities, normalized to  $F_m$  were measured on DCMU-treated thylakoid membranes at 193 K following two different protocols: (i) double-STSF excitation was applied in the train of seven flashes, with no waiting time between flashes ( $\Delta\tau = 0 \mu\text{s}$ , red data points) and (ii) after three simultaneously fired double flashes the waiting time between the two flashes was switched to  $\Delta\tau = 50 \text{ ms}$  (black data points). The obtained data are plotted as a function of the number of STSFs. In panel a, all simultaneously fired flashes are counted as one STSF and the two flashes fired with  $\Delta\tau = 50 \text{ ms}$  are considered as separate STSFs. In panel b, the

fluorescence intensity values are plotted as a function of the number of double flashes irrespective of the value of  $\Delta\tau$ .
